# Supplementary material for: Gabapentin and Duloxetine Prevent Oxaliplatin- and Paclitaxel-Induced Peripheral Neuropathy by Inhibiting Extracellular Signal-Regulated Kinase 1/2 (ERK1/2) Phosphorylation in Spinal Cords of Mice
Source: PubMed Central journal article supplement (PMC7824557; doi:10.3390/ph14010030), 2020-12-31

## Supplementary Figure

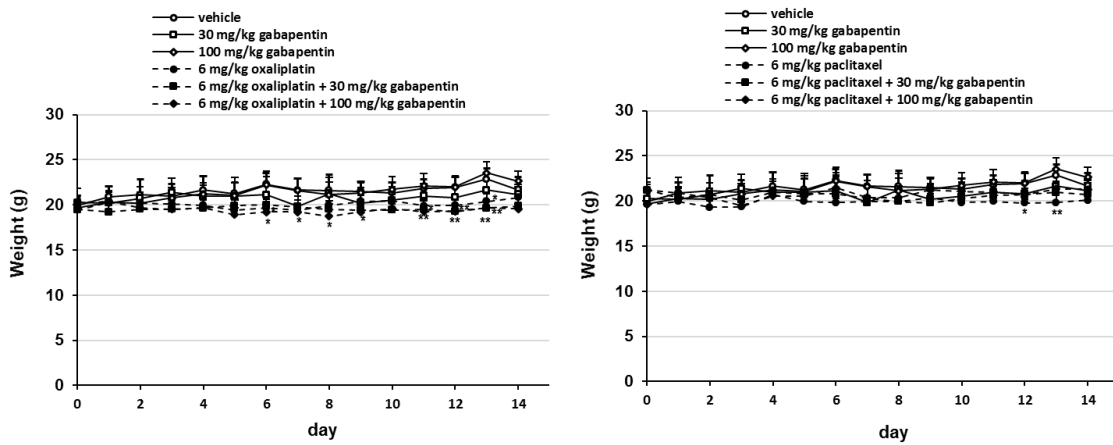

**Figure S1.** Safety of oxaliplatin, paclitaxel, and gabapentin administrated in vivo. Oxaliplatin (6 mg/kg, i.v.) and paclitaxel (6mg/kg, i.v.) were administered on days 0 and 7. Gabapentin (30 or 100 mg/kg, p.o.) was administered daily from days 0 to 14. Mice were weighed before the first treatment and daily throughout the treatment period. Data are presented as means and S.D. \*P < 0.05, \*\*P < 0.01 vs. vehicles (Shapiro-Wilk test and one-way analysis of variance (ANOVA) with Tukey test).

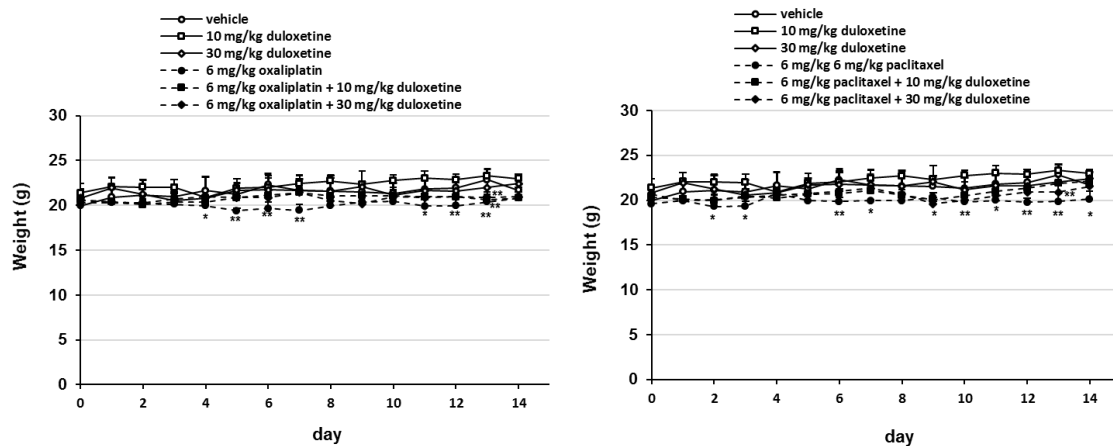

**Figure S2.** Safety of oxaliplatin, paclitaxel, and duloxetine administrated in vivo. Oxaliplatin (6 mg/kg, i.v.) and paclitaxel (6mg/kg, i.v.) were administered on days 0 and 7. Duloxetine (10 mg/kg or 30mg/kg, p.o.) was administered daily from days 0 to 14. Mice were weighed before the first treatment and daily throughout the treatment period. Data are presented as means and S.D. \*P < 0.05, \*\*P < 0.01 vs. vehicles (Shapiro-Wilk test and one-way analysis of variance (ANOVA) with Tukey test).

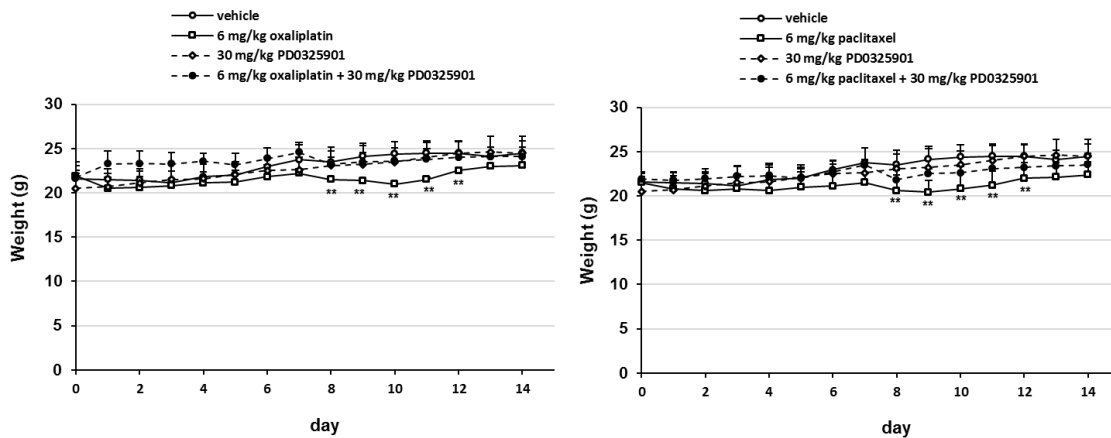

**Figure S3.** Safety of oxaliplatin, paclitaxel, and PD0325901 administrated in vivo. Oxaliplatin (6 mg/kg, i.v.) and paclitaxel (6mg/kg, i.v.) were administered on days 0 and 7). PD0325901 (30mg/kg, p.o.) was administered daily from days 0 to 14. Mice were weighed before the first treatment and daily throughout the treatment period. Data are presented as means and S.D. \*P < 0.05, \*\*P < 0.01 vs. vehicles (Shapiro-Wilk test and one-way analysis of variance (ANOVA) with Tukey test).

**Figure 5**

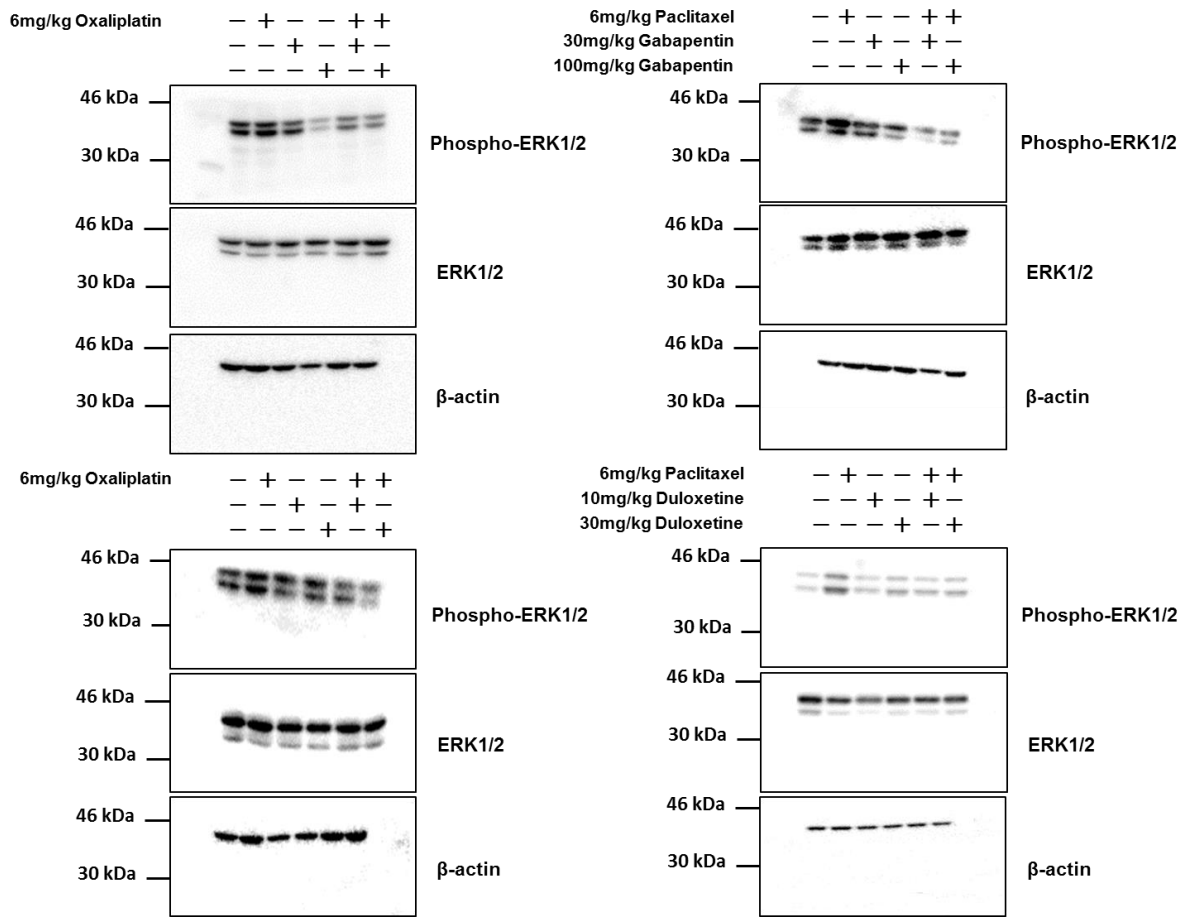

**Figure 8**

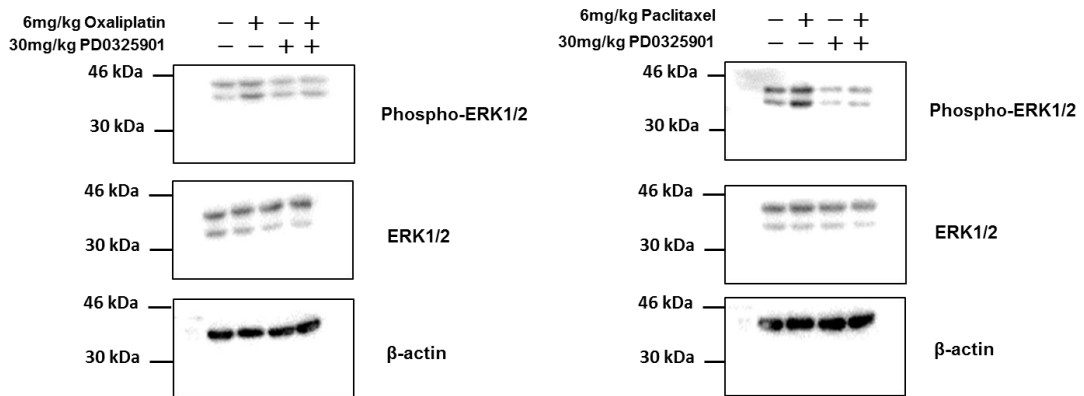

Supplement: pharmaceuticals-14-00030-s001.pdf [file pharmaceuticals-14-00030-s001.pdf]
